# Supplementary material
Source: PubMed Central journal article supplement (PMC1606619)

## Legends for Supplemental Figures

### **Supplemental Figure 1.**

#### Upregulation of ER $\alpha$ expression in Cav-1 KO mammary glands *in vivo*.

Inguinal mammary glands (# 4 and 5) were surgically excised from 3 week-old female WT and Cav-1 KO mice. Formalin-fixed, paraffin-embedded sections were then prepared and immuno-stained with anti-ER $\alpha$  rabbit IgG (H-184 from Santa Cruz). Same as Figure 5, except that lower power images (original magnification, 10X) are shown. Note that ER $\alpha$  expression levels are dramatically upregulated in Cav-1 KO luminal epithelial cells (See arrows). Sections from WT mammary glands are shown for comparison.

### **Supplemental Figure 2.**

#### Representative negative control images for ER $\alpha$ and Cyclin D1 immunostaining.

Formalin-fixed, paraffin-embedded sections were prepared from ER $\alpha$  (+) and ER $\alpha$  (--) breast cancer samples were incubated with non-immune rabbit IgG (at the same dilution) as negative controls for ER $\alpha$  and Cyclin D1 immunostaining (both rabbit polyclonals). Bound primary antibodies were detected with an HRP-conjugated secondary antibody. Slides were then counter-stained with hematoxylin (blue color). Representative images are shown. Note that little or no non-specific staining is observed. See Figure 10 for comparison.

# ER $\alpha$ Staining

---

WT

KO

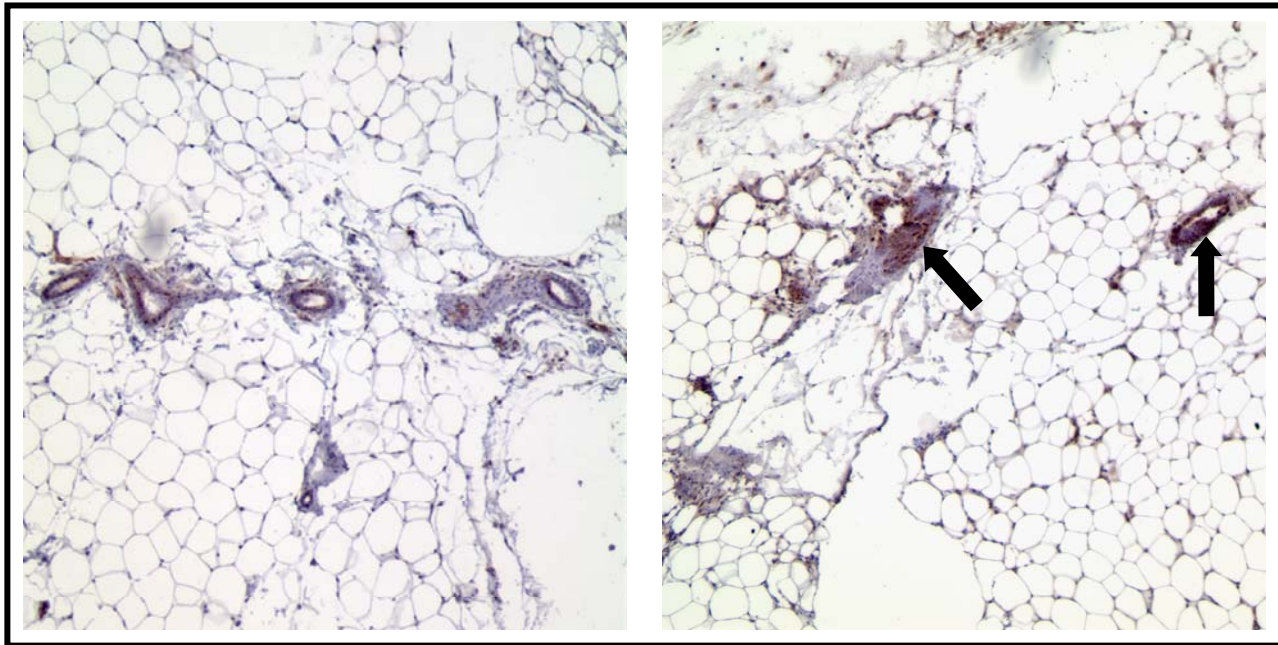

10X

## Negative Controls on Human Sections

---

Cyclin D1 Staining

ER $\alpha$  Staining

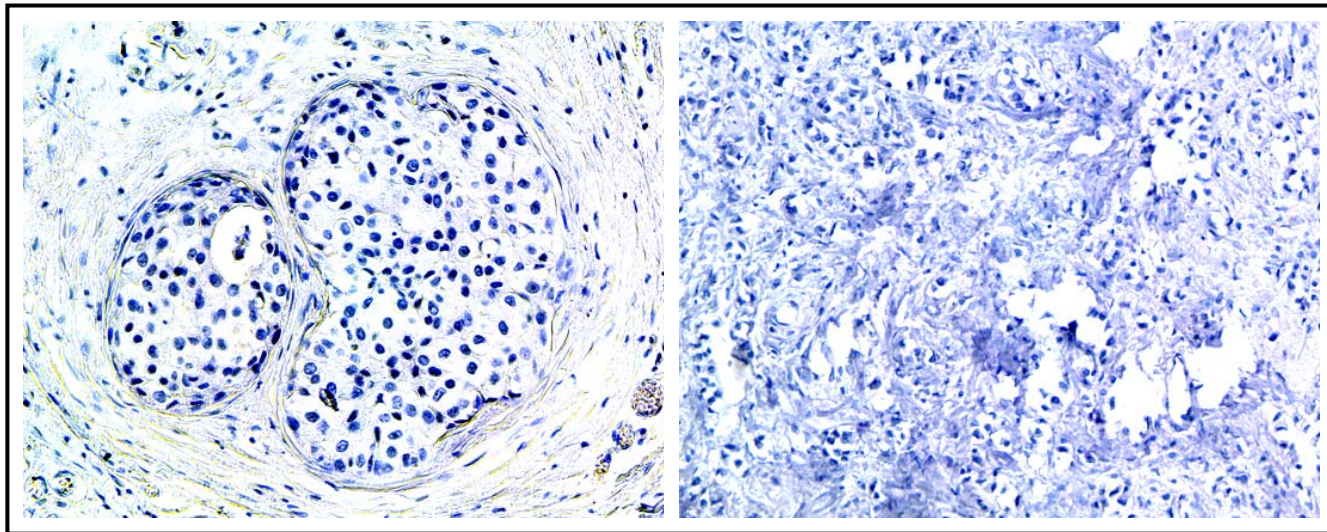

Supplement: amjpathol_168_6_1998__1.pdf [file amjpathol_168_6_1998__1.pdf]
